# Supplementary material for: Chiral or achiral: four isomeric Cd(ii) coordination polymers based on phenylenediacrylate ligands
Source: Royal Society of Chemistry journal article supplement (doi:10.1039/c4ce02019g), 2014-12-19
Supplement: c4ce02019g1.pdf [file c4ce02019g1.pdf]

## Electronic Supplementary Information (ESI)

### Chiral or achiral: Four Isomeric Cd(II) Coordination Polymers Based on Two Isomeric Phenylenediacrylate ligands

Qian Sun, Ai-Ling Cheng, Kun Wang, Xiu-Chun Yi, En-Qing Gao

Shanghai Key Laboratory of Green Chemistry and Chemical Processes, Department of Chemistry, East China Normal University, Shanghai 200062, China

**Table S1** Hydrogen bonding distance and angle data

**Figure S1.** View of the disorder of two independent ligands in **2p**.

**Figure S2.** XRD patterns of the complexes compared with those simulated from crystal data.

**Figure S3.** IR spectra of the complexes.

**Figure S4.** The arrangement of zigzag and helical chains in **1p** and **1m**, respectively.

**Figure S5.** Homochiral 2D hydrogen-bonded layers in **2p** and **2m**, and views of the 3D structures with **ppda** and **mpda** ligands as interlayer pillars.

Table S1 Hydrogen bonding distance (Å) and angle (°) data

| Compound  | D-H...A         | D-H       | H...A     | D...A    | <DHA   | Symmetry code            |
|-----------|-----------------|-----------|-----------|----------|--------|--------------------------|
| <b>1p</b> | O3-H3W1...O1C   | 0.841(18) | 1.826(19) | 2.663(4) | 174(4) | C: -x+1/2, y-1/2, -z+3/2 |
|           | O3-H3W2...O2D   | 0.846(18) | 1.860(19) | 2.700(4) | 172(5) | D: -x+1, y-1, -z+3/2     |
| <b>1m</b> | O3-H3W1...O1C   | 0.841(16) | 1.887(17) | 2.725(2) | 174(3) | C: x+1/2, -y+3/2, -z     |
|           | O3-H3W2...O2D   | 0.861(17) | 1.848(17) | 2.694(2) | 167(3) | D: x+1, -y+2, -z         |
| <b>2p</b> | O5-H5W2...O4F   | 0.84(2)   | 1.99(5)   | 2.80(4)  | 163(7) | F: -x+1, -y+1, -z        |
|           | O5-H5W2...O4'F  | 0.84(2)   | 1.98(4)   | 2.81(3)  | 174(8) |                          |
|           | O5-H5W1...O9A   | 0.83(2)   | 1.98(4)   | 2.76(3)  | 156(7) | A: -x+1, y-1/2, -z+1/2   |
|           | O5-H5W1...O9'A  | 0.83(2)   | 2.16(5)   | 2.95(3)  | 158(6) |                          |
|           | O6-H6W2...O2A   | 0.85(2)   | 1.99(3)   | 2.786(6) | 155(6) | A: -x+1, y-1/2, -z+1/2   |
|           | O6-H6W1...O9    | 0.85(2)   | 1.93(3)   | 2.75(2)  | 160(6) |                          |
|           | O6-H6W1...O9'   | 0.85(2)   | 1.90(5)   | 2.68(4)  | 152(6) |                          |
|           | O7-H7W2...O4G   | 0.84(2)   | 2.12(7)   | 2.77(4)  | 134(7) | G: x, -y+1/2, z+1/2      |
|           | O7-H7W2...O4'G  | 0.84(2)   | 2.17(6)   | 2.90(4)  | 145(7) |                          |
|           | O7-H7W1...O10H  | 0.84(2)   | 2.02(6)   | 2.81(4)  | 156(7) | H: -x+2, y-1/2, -z+1/2   |
|           | O7-H7W1...O10'H | 0.84(2)   | 2.13(7)   | 2.92(6)  | 156(8) |                          |
|           | O8-H8W2...O10I  | 0.83(2)   | 2.29(5)   | 3.05(3)  | 154(7) | I: -x+2, y+1/2, -z+1/2   |
|           | O8-H8W2...O10'I | 0.83(2)   | 2.00(6)   | 2.76(4)  | 152(7) |                          |
|           | O8-H8W1...O11C  | 0.83(2)   | 2.02(3)   | 2.807(6) | 160(7) | C: -x+1, y+1/2, -z+1/2   |
| <b>2m</b> | O5-H5W2...O4E   | 0.86(2)   | 2.03(3)   | 2.802(5) | 150(5) | E: -x+2, y-1/2, -z+1     |
|           | O5-H5W1...O10F  | 0.850(19) | 1.97(3)   | 2.772(5) | 156(6) | F: x+1, y, z             |
|           | O6-H6W2...O2G   | 0.864(19) | 1.97(2)   | 2.768(4) | 154(4) | G: -x+2, y-1/2, -z+2     |
|           | O6-H6W1...O4C   | 0.855(19) | 1.90(2)   | 2.706(5) | 157(5) | C: x, y, z+1             |
|           | O7-H7W1...O3A   | 0.85(2)   | 2.21(5)   | 2.877(5) | 136(6) | A: -x+1, y-1/2, -z+1     |
|           | O7-H7W2...O6    | 0.835(19) | 2.13(3)   | 2.904(5) | 154(5) |                          |
|           | O8-H8W1...O11H  | 0.83(2)   | 1.98(2)   | 2.805(4) | 173(7) | H: -x+1, y+1/2, -z+1     |
|           | O8-H8W2...O3H   | 0.83(2)   | 1.95(2)   | 2.778(5) | 176(6) | H: -x+1, y+1/2, -z+1     |

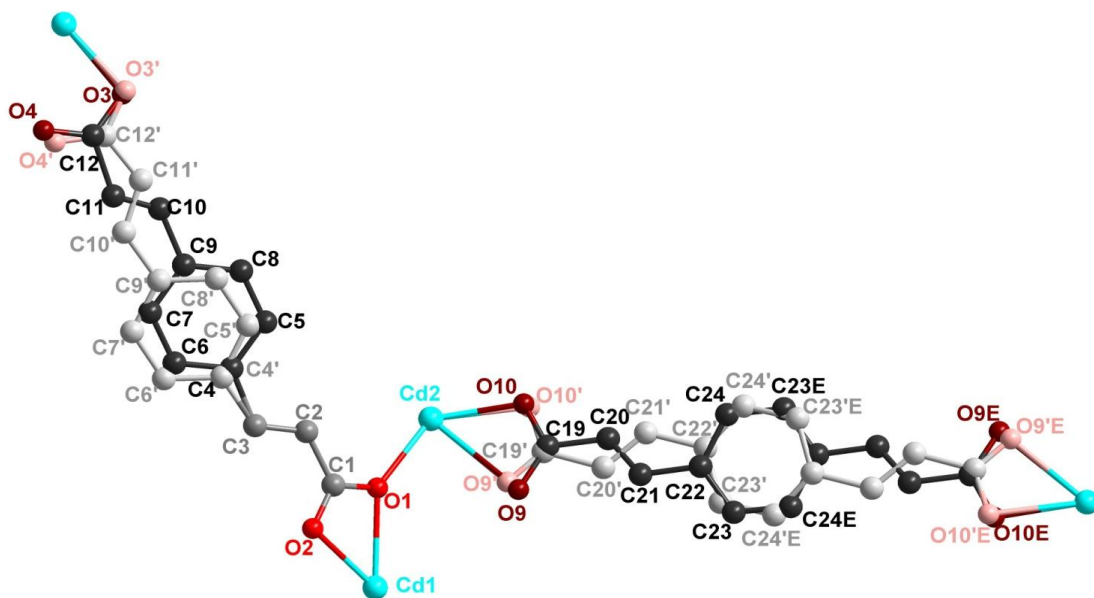

Figure S1. View of the disorder of two independent ligands in **2p**. Symmetry code E = 2-x, 1-y, 1-z.

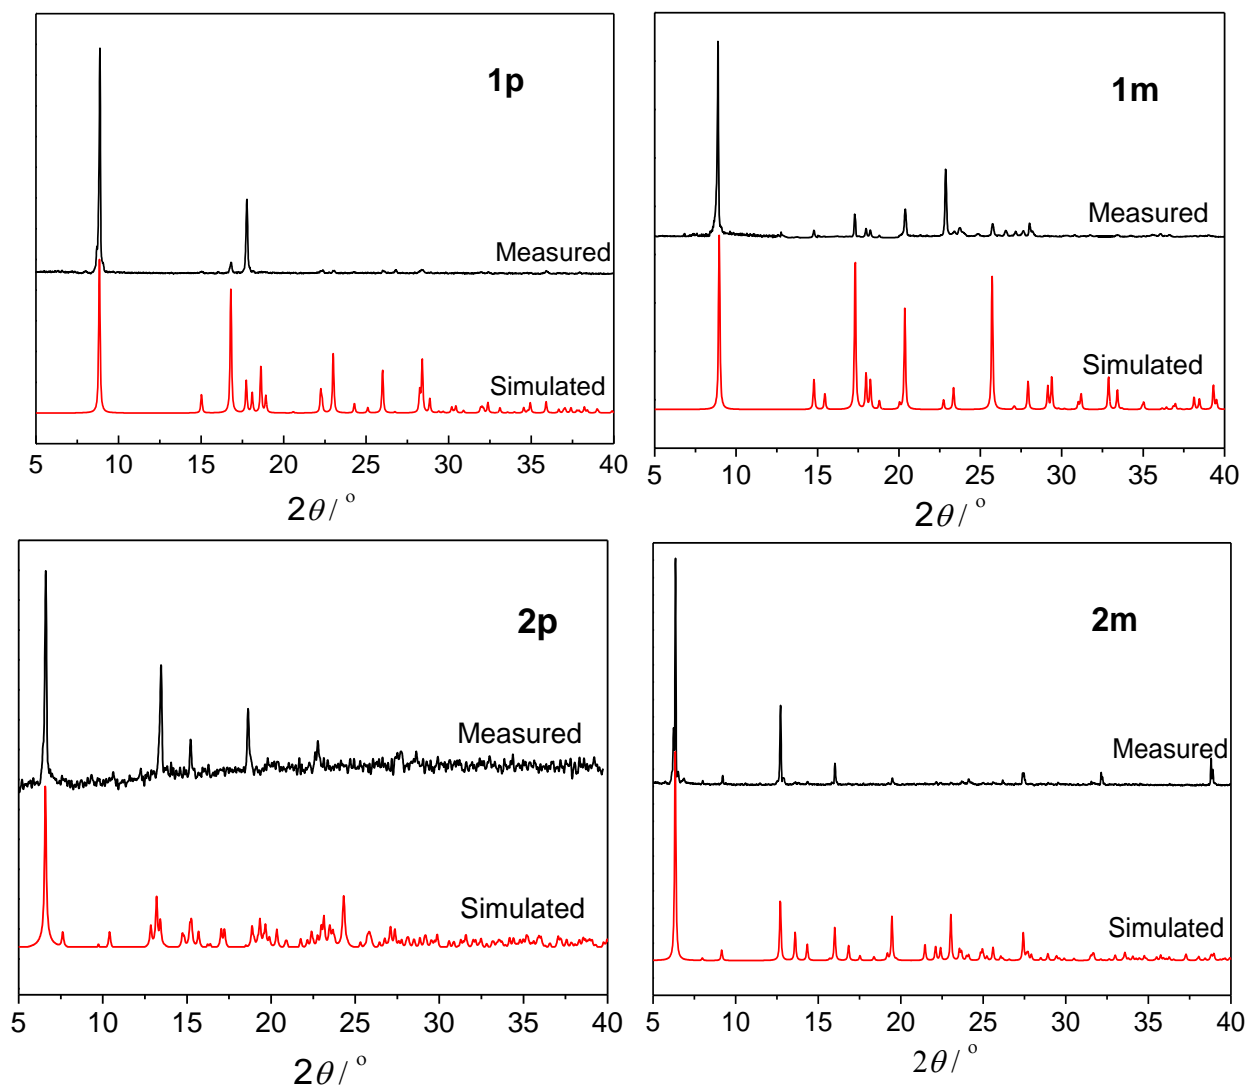

Figure S2. XRD patterns of the complexes compared with those simulated from crystal data.

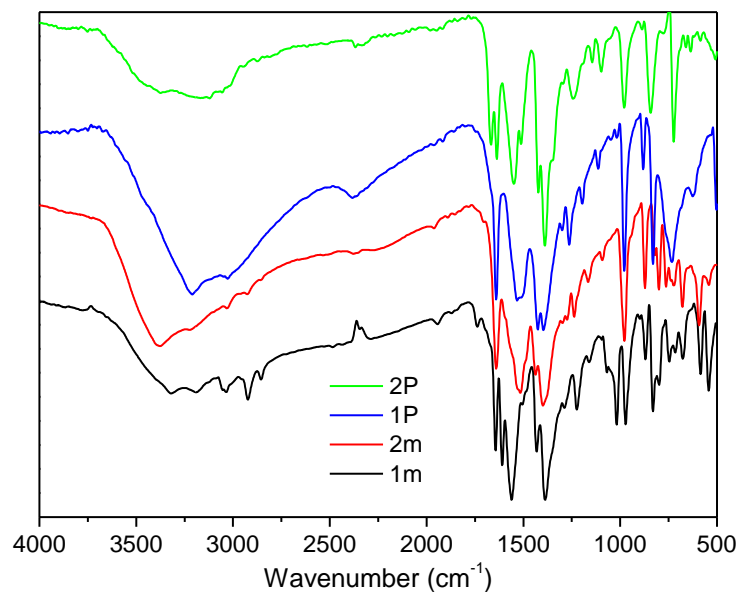

Figure S3. IR spectra of the complexes.

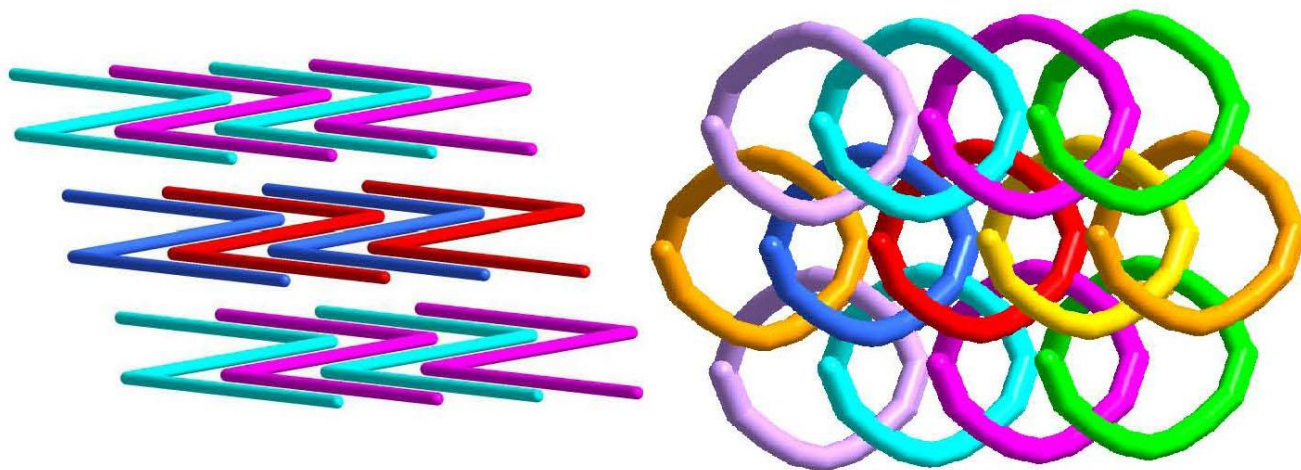

Figure S4. The arrangement of zigzag and helical chains in **1p** (left) and **1m** (right), respectively.

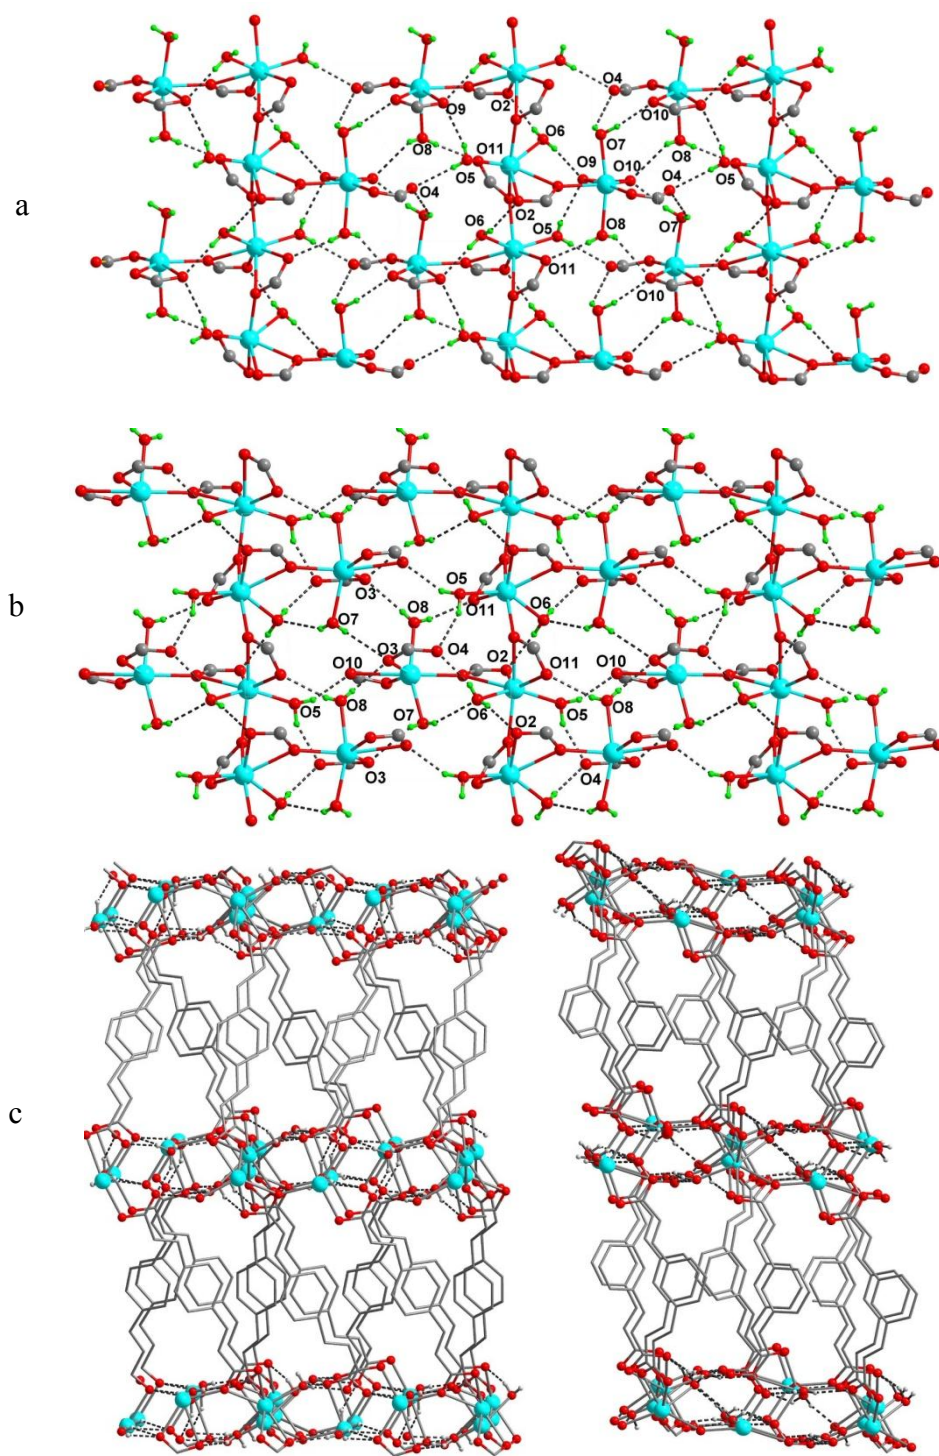

Figure S5. Homochiral 2D hydrogen-bonded layers in **2p** (a) and **2m** (b), and views of the 3D structures with ppda and mpda ligands as interlayer pillars (c). Only one component of each disordered ligand in **2p** is shown in (a) and (c).
